# Supplementary material
Source: PubMed Central journal article supplement (PMC5518869)
Supplement: cr20173x1.pdf [file cr20173x1.pdf]

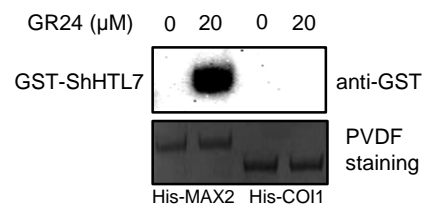

**Supplementary information, Figure S1A ShHTL7 interacted with MAX2 but not another F-box protein COI1.**

Pull-down assays using GST-ShHTL7 and His-MAX2-ASK1 or His-COI1-ASK1 (negative control) in the absence or presence of 20  $\mu$ M GR24. GST-ShHTL7 was detected by anti-GST antibody and the PVDF membrane was stained with Memstain to show equal loading.

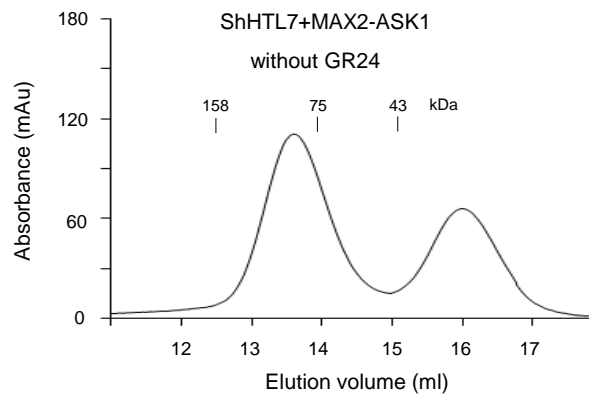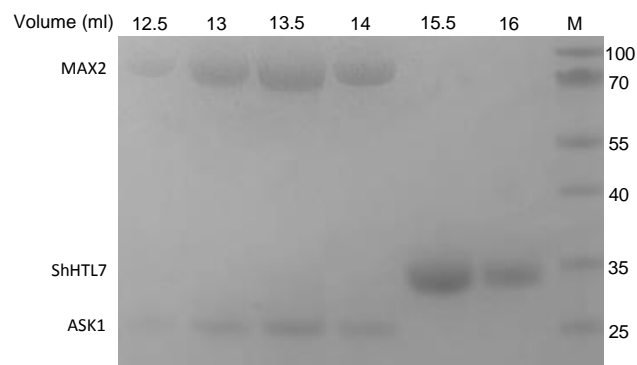

**Supplementary information, Figure S1B ShHTL7 did not interact with MAX2 in the absence of GR24.**

SEC analysis (upper panel) of the interaction between ShHTL7 and MAX2-ASK1 in the absence of GR24; the elution volumes of the molecular weight markers are indicated above the peaks. SDS-PAGE analysis (lower panel) of peak fractions from the upper panel; M, molecular weight ruler (kDa).

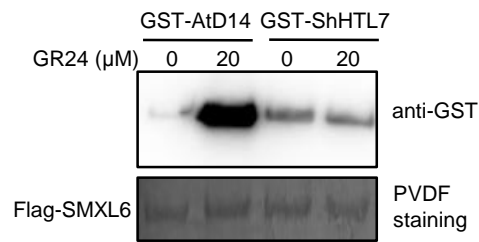

**Supplementary information, Figure S1C GR24-enhanced interaction between ShHTML7 and SMXML6 was not detected in the pull-down assay.**

Pull-down assays using GST-ShHTML7 and Flag-SMXML6 in the absence or presence of 20  $\mu\text{M}$  GR24. GST-AtD14 protein was used as a positive control. GST-fused proteins were detected by anti-GST antibody and the PVDF membrane was stained with Memstain to show equal loading.

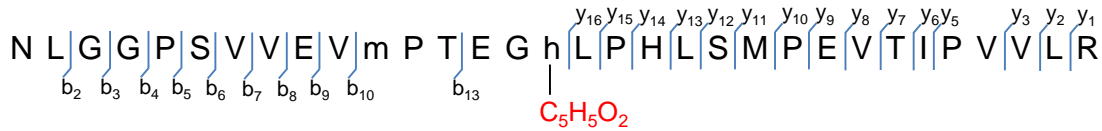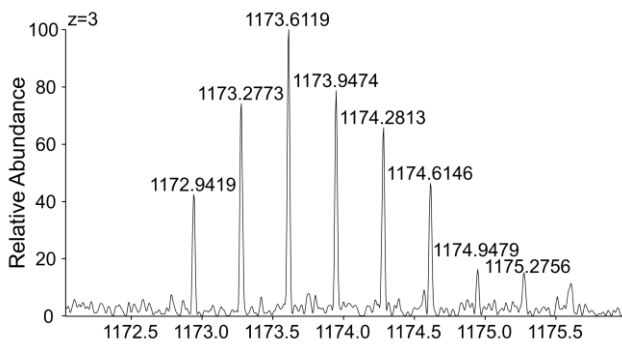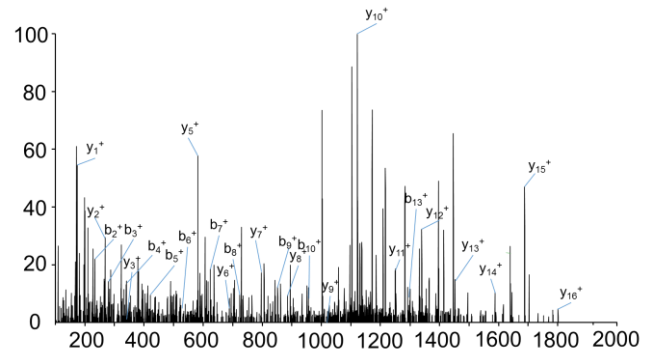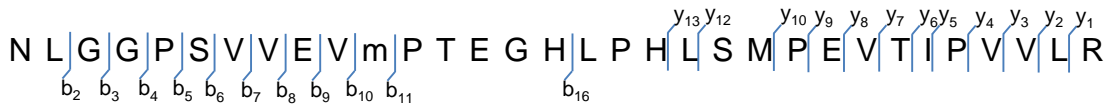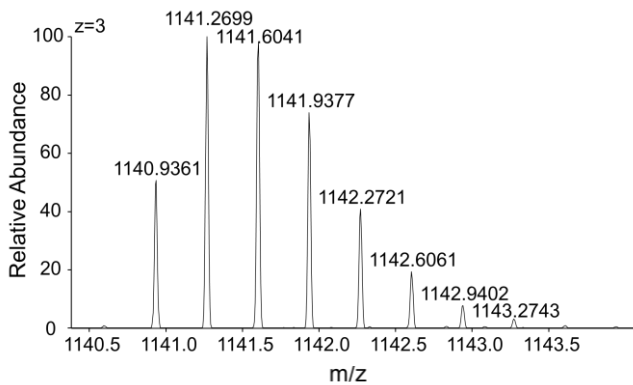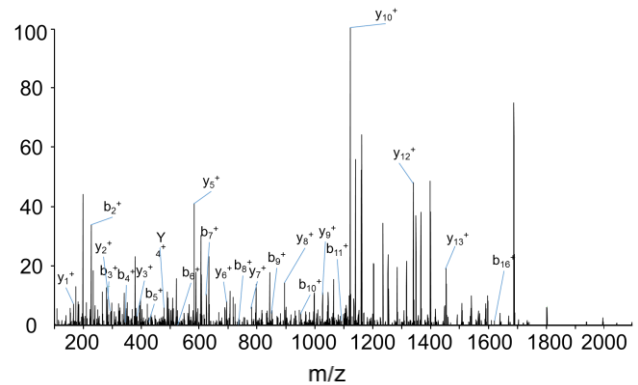

**Supplementary information, Figure S1D ShHTL7 hydrolyzed 5DS and generated the C<sub>5</sub>H<sub>5</sub>O<sub>2</sub>-modification on the catalytic residue H246.**

A triply charged peptide (244-NLGGPSVVEVmPTEGHLPHLSMPEVTIPVVL R-262) of ShHTL7 with the 5DS-derived C<sub>5</sub>H<sub>5</sub>O<sub>2</sub>-modification on H246 was identified by MS/MS (upper panel, m/z = 1172.9419; lowercase 'h' indicates the C<sub>5</sub>H<sub>5</sub>O<sub>2</sub>-modified H246; lowercase 'm' indicates the oxidized M254); the modified peptide was isolated from the trypsin digestion products of ShHTL7 in the 5DS-induced ShHTL7-ShMAX2-ASK1 complex collected in SEC. As control, no C<sub>5</sub>H<sub>5</sub>O<sub>2</sub>-modification on H246 of ShHTL7 was detected when ShHTL7 without pre-induction of GR24 was subjected to MS/MS analysis (lower panel, m/z = 1135.6088; lowercase 'm' indicates the oxidized M254). Labelled peaks in right column correspond to masses of y and b ions of the peptide displayed on the top, respectively.

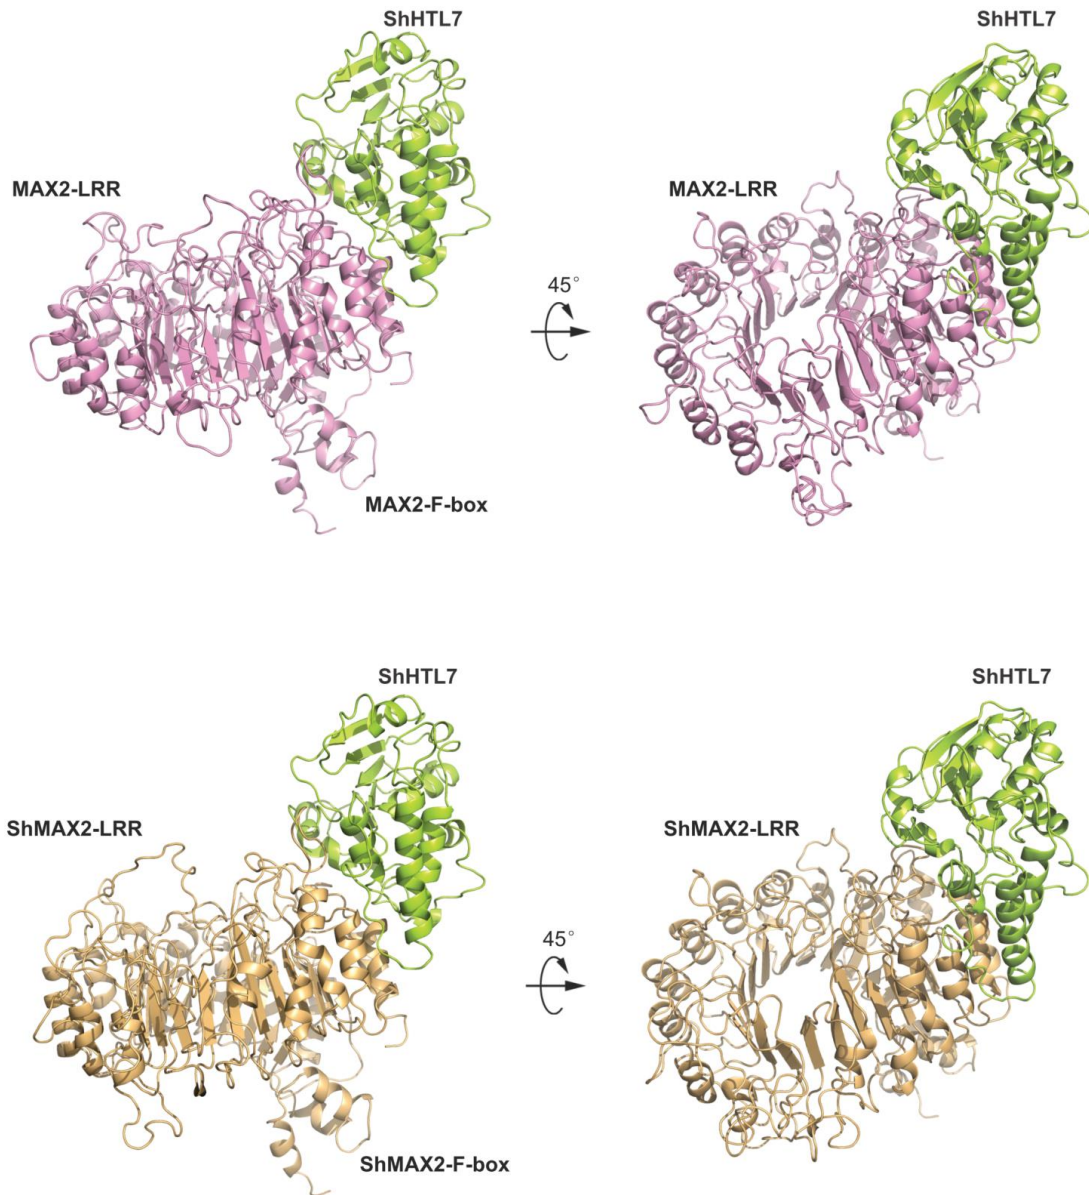

**Supplementary information, Figure S1E Overall structural models for the ShHTL7-MAX2 complex and the ShHTL7-ShMAX2 complex.**

Structural models for the ShHTL7-MAX2 complex (upper panel) and the ShHTL7-ShMAX2 complex (lower panel), respectively. ShHTL7, MAX2 and ShMAX2 are shown as cartoon representation and coloured as limon, pink and light orange, respectively. The structure of ShHTL7 is a homology model based on AtD14 from the CLIM-AtD14-D3-ASK1 complex (PDB code: 5HZG; A chain); the structures of MAX2 and ShMAX2 are homology models based on D3 from the CLIM-AtD14-D3-ASK1 complex (PDB code: 5HZG; B chain). In each protein complex, the relevant homology models are structurally superimposed onto their corresponding templates in the CLIM-AtD14-D3-ASK1 complex.

## **Supplementary Information, Materials and Methods**

### **Protein preparation**

The full-length *Striga hermonthica* HTL7 (ShHTL7) was expressed in *E. coli* strain BL21 (DE3) as an N-terminal GST fusion protein. ShHTL7 was chosen from the ShHTL family due to its strongest response to GR24 and tested natural SLs [10]. After purified by Glutathione Sepharose 4B (GE Healthcare) affinity chromatography, GST-ShHTL7 was released by 10 mM GSH elution or on-column cleavage to remove GST tag, then further purified by Hitrap Q (GE Healthcare) followed by Superdex 200 10/300 (GE Healthcare) in a buffer containing 10 mM Tris-HCl, pH 8.0, 150 mM NaCl, 5 mM DTT. The preparation of GST-D14 is similar to that of GST-ShHTL7.

The full-length *Arabidopsis thaliana* MAX2 and ASK1 that stabilizes F-box protein [19] were co-expressed in sf9 insect cells as a His<sub>6</sub>-Flag fusion protein and a Flag-tagged protein, respectively. After purified by Ni-NTA (Novagen) affinity chromatography, the His-MAX2-ASK1 complex was eluted and further purified by Hitrap Q (GE Healthcare) followed by Superdex 200 10/300 (GE Healthcare) in a buffer containing 20 mM MES, pH 6.5, 150 mM NaCl and 5 mM DTT. The *Striga hermonthica* MAX2 (ShMAX2) was similarly co-expressed with ASK1.

The full-length *Arabidopsis thaliana* SMAX1 was expressed in sf9 cells with an N-terminal Flag tag and purified by anti-Flag beads (Sigma, A2220) according to the manual book. The *Arabidopsis thaliana* SMXL6 was prepared by using similar methods.

### **Pull-down assay**

For the interaction between ShHTL7 and ShMAX2, ~20 µg His-ShMAX2-ASK1 was used as the bait and ~12 µg GST-ShHTL7 was used as the prey in the presence of 20 µM (+)-GR24 or its solvent DMSO as the control. The reaction mixtures were incubated with Ni-

NTA beads (Qiagen) at 4°C for 1 h in the reaction buffer (50 mM Tris-HCl, pH 6.8, 100 mM NaCl, 25 mM imidazole, 10% (v/v) glycerol, 0.1% (v/v) Tween 20, 20 mM 2-mercaptoethanol). After extensive wash, the protein complexes on the beads were released and then subjected for western blot analysis. The pull-down assay of ShHTL7 with another F-box protein CO11 (the jasmonate receptor in *Arabidopsis thaliana*) was performed to serve as a negative control.

For the interaction between ShHTL7 and SMAX1, ~20 µg Flag-SMAX1 protein was used as the bait and ~12 µg GST-ShHTL7 was used as the prey in the presence of 20 µM (+)-GR24 or its solvent DMSO as the control. AtD14 was used as a control of ShHTL7. The reaction mixtures were incubated with anti-flag beads (Sigma) at 4°C for 1 h in the reaction buffer (50 mM Tris-HCl, PH 7.0, 150 mM NaCl, 0.5% (v/v) Tween 20). After extensive wash, the protein complexes on the beads were released and then subjected for western blot analysis. The pull-down assay of ShHTL7 with SMXL6 was performed by using similar methods.

GST-fused proteins were detected by a monoclonal anti-GST antibody (Abmart). The PVDF membrane was stained with Memstain (Applygen) to show equal loading.

### **Size exclusion chromatography (SEC) assay**

Purified ShHTL7 (roughly 10 µM) and MAX2/ShMAX2-ASK1 proteins (roughly 5 µM) were incubated with 200 µM GR24, or equal amount of DMSO as the solvent control, at 25°C for one hour in the buffer containing 20 mM MES, pH 6.5, 150 mM NaCl, 5 mM DTT. The reaction mixture was then injected onto a Superdex 200 10/300 column for analysis at a flow rate of 0.3 ml/min. The fractions (0.5 ml/fraction) were analyzed by SDS-PAGE and visualized by coomassie brilliant blue staining.

### **Mass spectrometric analysis of covalent modification**

The SEC-separated ShHTL7-MAX2/ShMAX2-ASK1 complex induced by GR24 or 5DS was analyzed by SDS-PAGE and visualized by coomassie brilliant blue staining. The gel bands of ShHTL7 were excised for mass spectrometric analysis as previously described [18].

MS/MS spectra from each LC-MS/MS run were searched against the ShHTL7 protein database using Proteome Discoverer (Version 1.4) searching algorithm. The search criteria were as follows: full tryptic specificity was required; two missed cleavages were allowed; carbamidomethylation was set as fixed modification; oxidation (on the residue of Met) were set as variable modifications; precursor ion mass tolerance was 10 ppm for all MS acquired in the Orbitrap mass analyzer; and fragment ion mass tolerance was 0.02 Da for all MS2 spectra acquired in the ion trap. High confidence score filter

(FDR < 1%) was used to select the “hit” peptides and their corresponding MS/MS spectra were manually inspected.

### Homology modeling

Homology models for the ShHTL7-MAX2 complex and the ShHTL7-ShMAX2 complex were built on the SWISS-MODEL server (<http://swissmodel.expasy.org/>), using chain A (AtD14) and chain B (D3) of the CLIM-AtD14-D3-ASK1 complex structure (PDB code: 5HZG) as templates. Structural figures of the two protein complexes were generated in PyMOL [20]. Both structures of the two protein complexes were perfectly assembled with no obvious clashes observed in each interface. Models were refined in COOT [21] by satisfying stereochemical restraints of polypeptide chain configurations according to the Ramachandran plot. The quality of the obtained models was assessed by PROCHECK [22].

19 Yan, J., Zhang, C., Gu, M., et al. The Arabidopsis CORONATINE INSENSITIVE1 protein is a jasmonate receptor. *Plant Cell* 2009; 21: 2220-2236.

20 DeLano, W. The PyMOL Molecular Graphics System 2002.

21 Emsley, P., and Cowtan, K. Coot: model-building tools for molecular graphics. *Acta Crystallogr D Biol Crystallogr* 2004; **60**: 2126-2132.

22 Laskowski, R., MacArthur, M., Moss, D., and Thornton, J. PROCHECK: a program to check the stereochemical quality of protein structures. *J Appl Cryst* 1993; **26**: 283-291.
